# Supplementary material for: 10,12 Conjugated Linoleic Acid-Driven Weight Loss Is Protective against Atherosclerosis in Mice and Is Associated with Alternative Macrophage Enrichment in Perivascular Adipose Tissue
Source: Nutrients. 2018 Oct 3;10(10):1416. doi: 10.3390/nu10101416 (PMC6213611; doi:10.3390/nu10101416)
Supplement: Supplementary file 1 [file nutrients-10-01416-s001.pdf]

## Supplementary Material

Table S1. Phenotype summary of study mice<sup>1</sup>.

| Table 1          | Body weight (g)      | Adiposity (% BW)     | Fasting glucose (mg/dL) | Liver TG (mg/mg protein) | IWAT <i>Egr2</i> expression |
|------------------|----------------------|----------------------|-------------------------|--------------------------|-----------------------------|
| <b>Chow</b>      | 28±0.7* <sup>#</sup> | 11±2.2* <sup>#</sup> | 156±16* <sup>#</sup>    | --                       | --                          |
| <b>HFHS</b>      | 48±1.0 <sup>#</sup>  | 43±3.8 <sup>#</sup>  | 270±12 <sup>#</sup>     | 1.60±0.09                | 1.0±0.1                     |
| <b>9,11 CLA</b>  | 47±1.3 <sup>#</sup>  | 40±1.8 <sup>#</sup>  | 240±08 <sup>#</sup>     | 1.31±0.16                | 0.99±0.03                   |
| <b>10,12 CLA</b> | 35±0.7*              | 23±1.3*              | 207±09*                 | <b>2.15±0.14*</b>        | <b>12.7±0.4*</b>            |
| <b>CR</b>        | 34±0.6*              | 37±2.3 <sup>#</sup>  | 144±15* <sup>#</sup>    | 0.96±0.10* <sup>#</sup>  | 0.8±0.1                     |

\*P<0.05 from HFHS control mice.

<sup>#</sup>P<0.05 from 10,12 CLA-supplemented mice.

-- not measured

**Figure S1.**

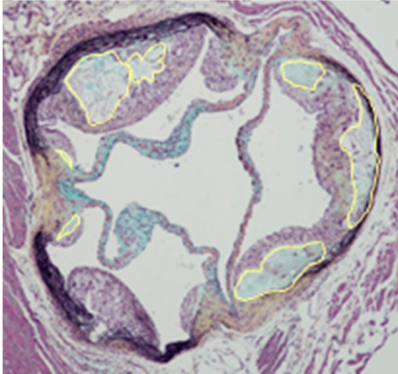

**Figure S1. Representative image of necrotic core areas identified for quantification using Image J software.**

**Table S2. Taqman primers**

| Gene name    | Thermo Fisher Scientific<br>accession number |
|--------------|----------------------------------------------|
| <i>Emr1</i>  | Mm00802530_m1                                |
| <i>Cd68</i>  | Mm00839636_g1                                |
| <i>Mac2</i>  | Mm00802901_m1                                |
| <i>Nos2</i>  | Mm00440502_m1                                |
| <i>Egr2</i>  | Mm00456650_m1                                |
| <i>Mrc1</i>  | Mm01329362_m1                                |
| <i>Arg1</i>  | Mm01190441_g1                                |
| <i>Ccl2</i>  | Mm00441242_m1                                |
| <i>Ccl7</i>  | Mm00443113_m1                                |
| <i>Saa3</i>  | Mm00441203_m1                                |
| <i>Tnf</i>   | Mm00443258_m1                                |
| <i>Il1b</i>  | Mm00434228_m1                                |
| <i>Il4</i>   | Mm00445259_m1                                |
| <i>Il10</i>  | Mm01288368_m1                                |
| <i>Fndc5</i> | Mm01181543_m1                                |
| <i>Gpr43</i> | Mm01176527_m1                                |
| <i>Gapdh</i> | Mm00662311_g1                                |

**Figure S2.**

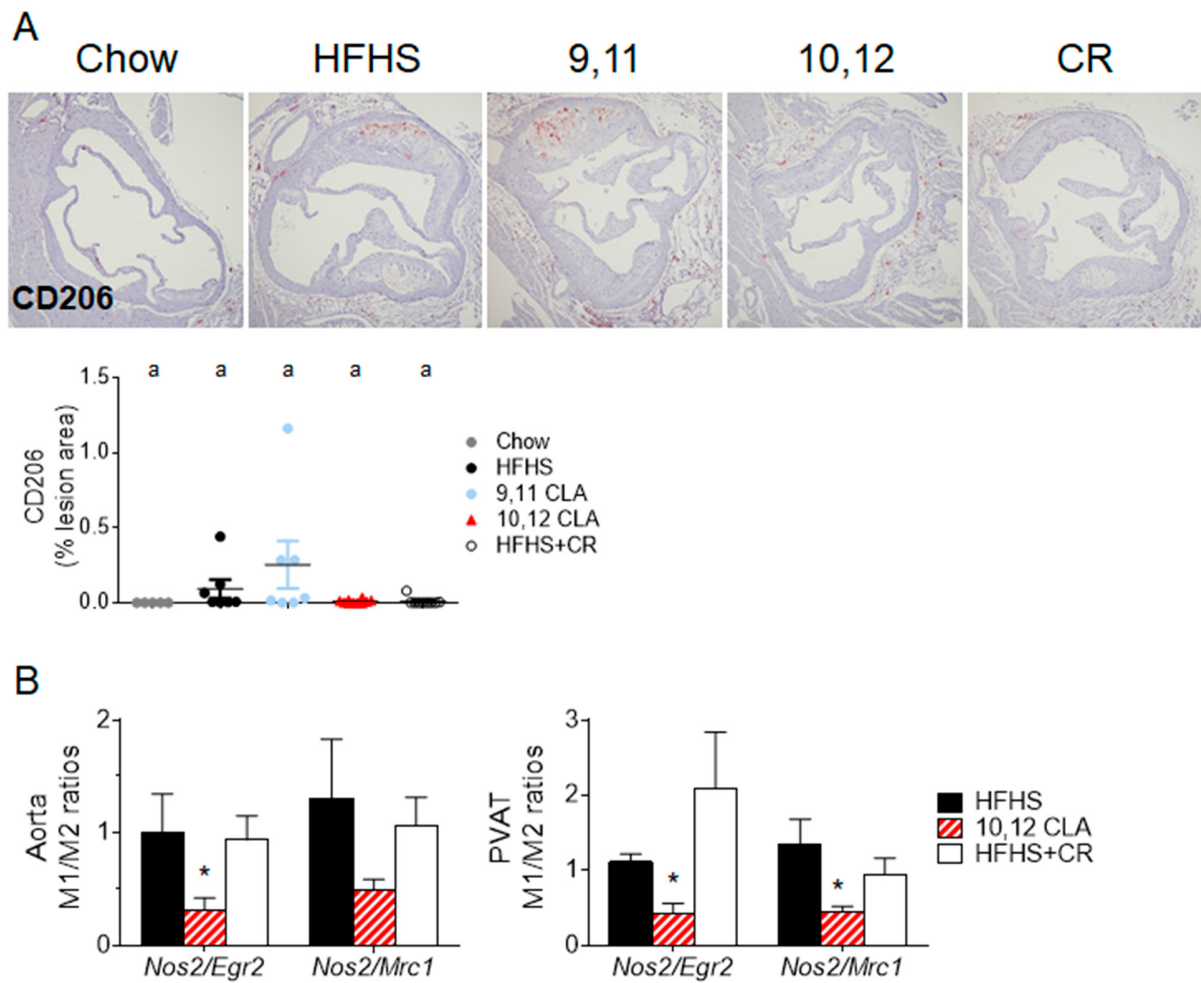

**Figure S2. 10,12 CLA decreases the ratio of M1/M2 macrophages.** *Ldlr*<sup>-/-</sup> mice were fed either chow or a HFHS diet for 12 weeks, then continued on the indicated diets for an additional 8 weeks. (A) Sections through the aortic sinus of the heart were stained with a polyclonal CD206 antibody, and staining was quantified. (B) RT-PCR was performed on cDNA from thoracic aortas and the surrounding PVAT. *n* = 8 mice/group. Data are presented as mean  $\pm$  SEM. \**P* < 0.05 from HFHS control.

**Figure S3.**

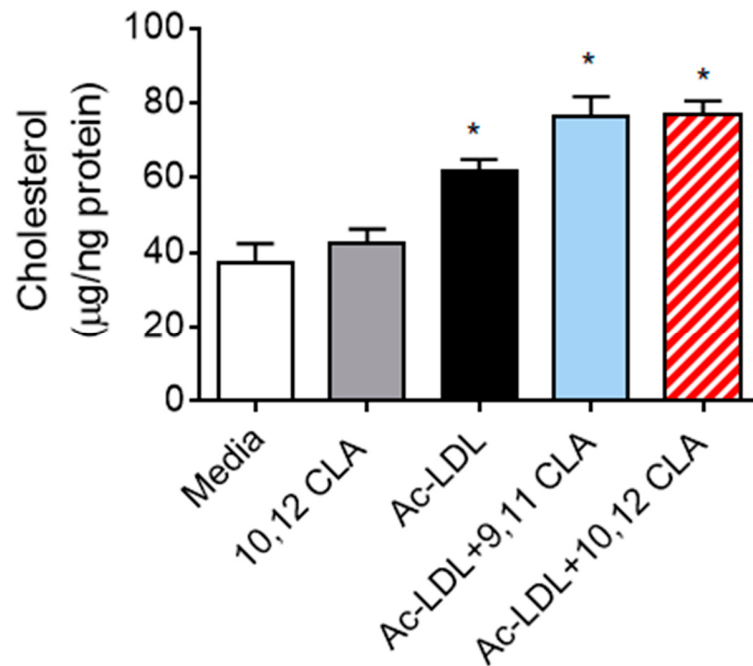

**Figure S3. CLA isomers do not alter the uptake of cholesterol by bone marrow-derived macrophages.** Non-polarized BMDMs were cultured with acetylated-LDL (50 µg/mL) for 24 hours, with or without co-treatment with 9,11 or 10,12 CLA (100 µM). CLA isomers were conjugated to fatty acid-free albumin at a 3:1 (fatty acid:albumin) molar ratio. n = 3. p<0.05 from media control.

## References

- [1] den Hartigh, LJ, Wang, S, Goodspeed, L, et al., Metabolically distinct weight loss by 10,12 CLA and caloric restriction highlight the importance of subcutaneous white adipose tissue for glucose homeostasis in mice, PLoS One, 2017;12:e0172912.
